# Supplementary material for: Walnut polyphenols and the active metabolite urolithin A improve oxidative damage in SH-SY5Y cells by up-regulating PKA/CREB/BDNF signaling
Source: Royal Society of Chemistry journal article supplement (doi:10.1039/d2fo03310k), 2022-12-27

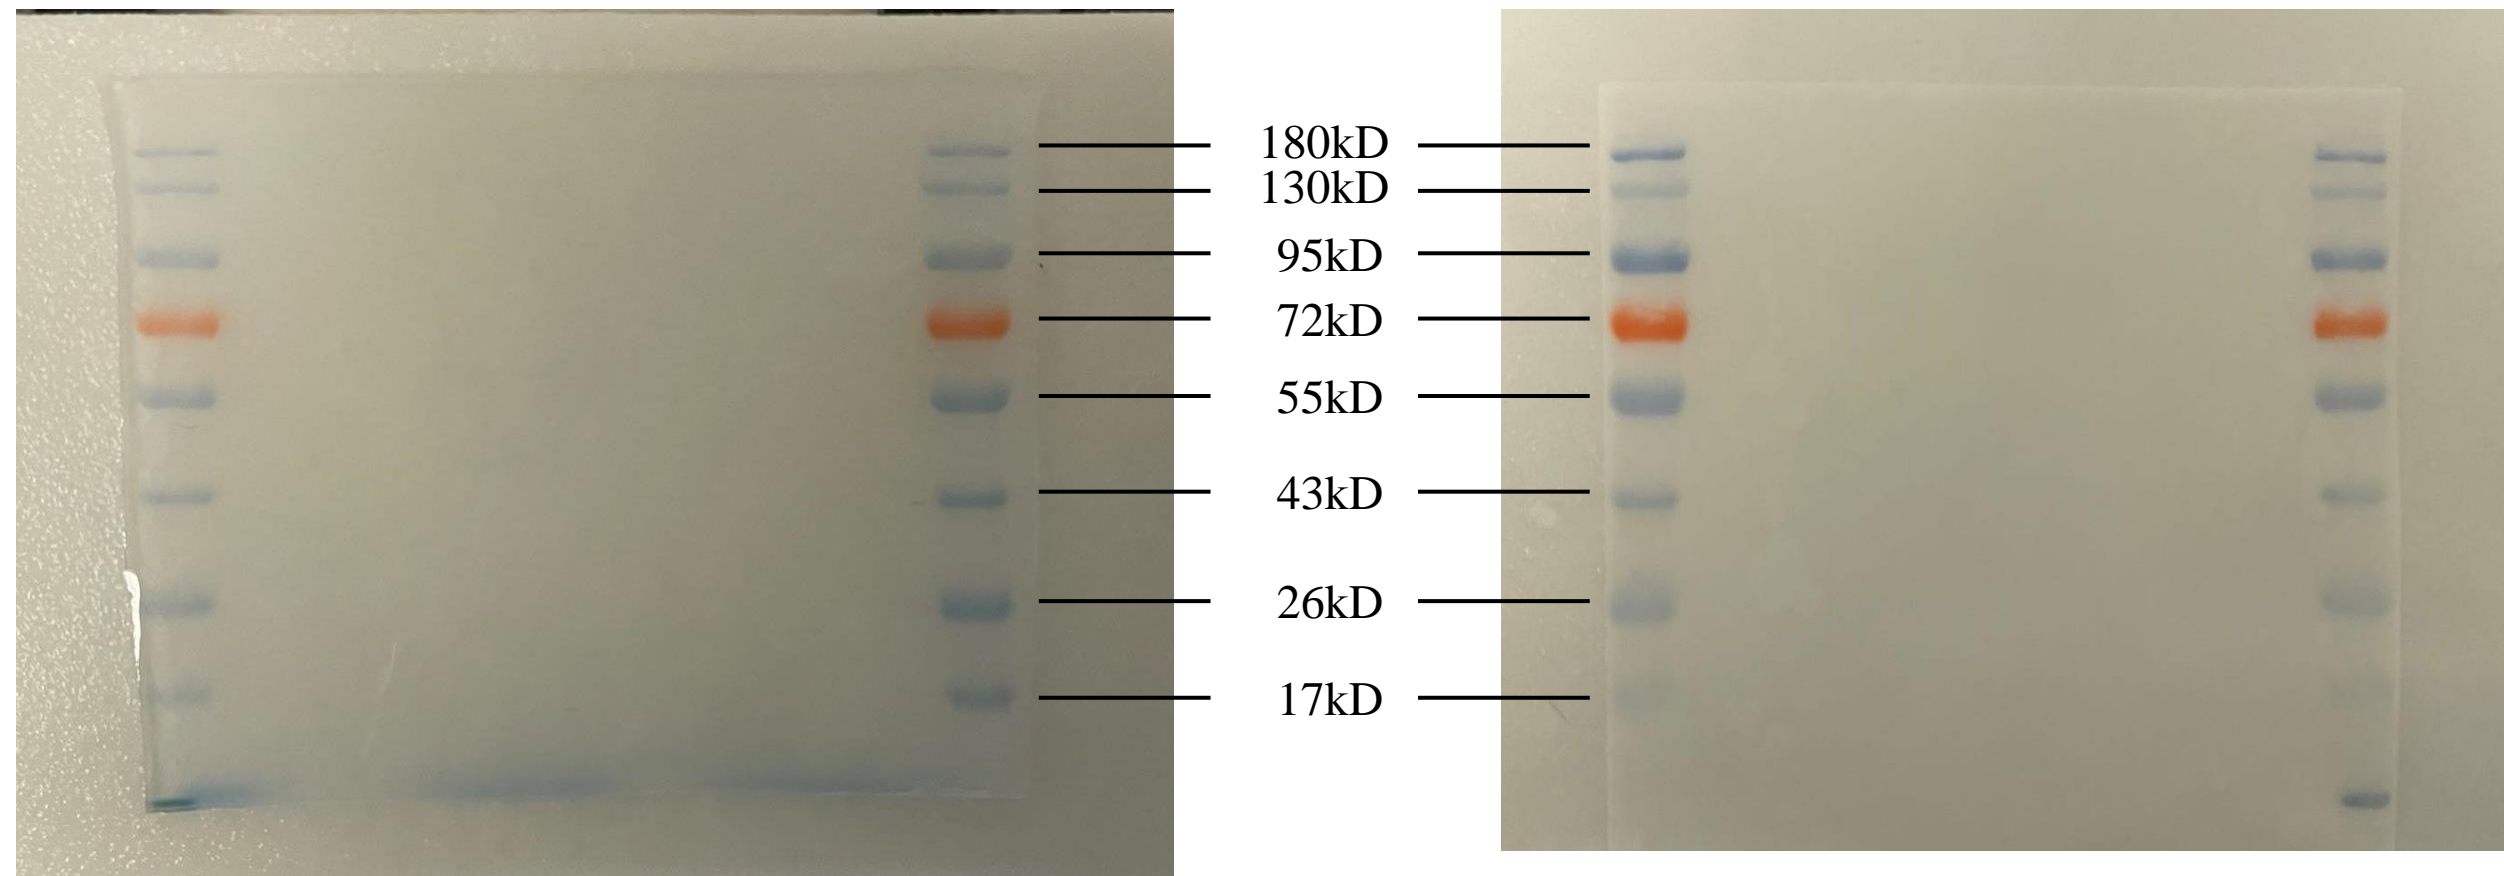

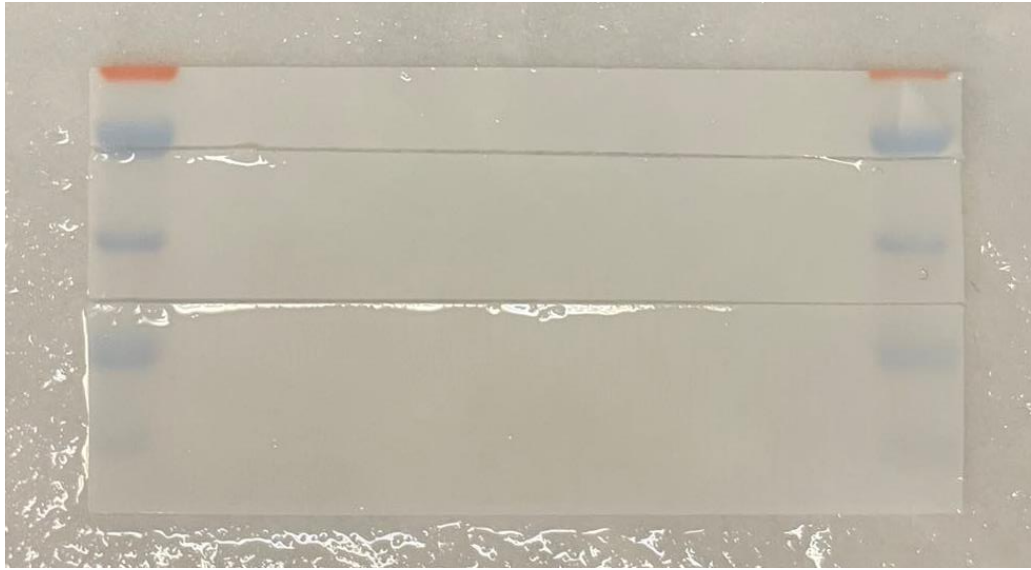

P-PKA、P-CREB  
CREB、 $\beta$ -actin

BDNF

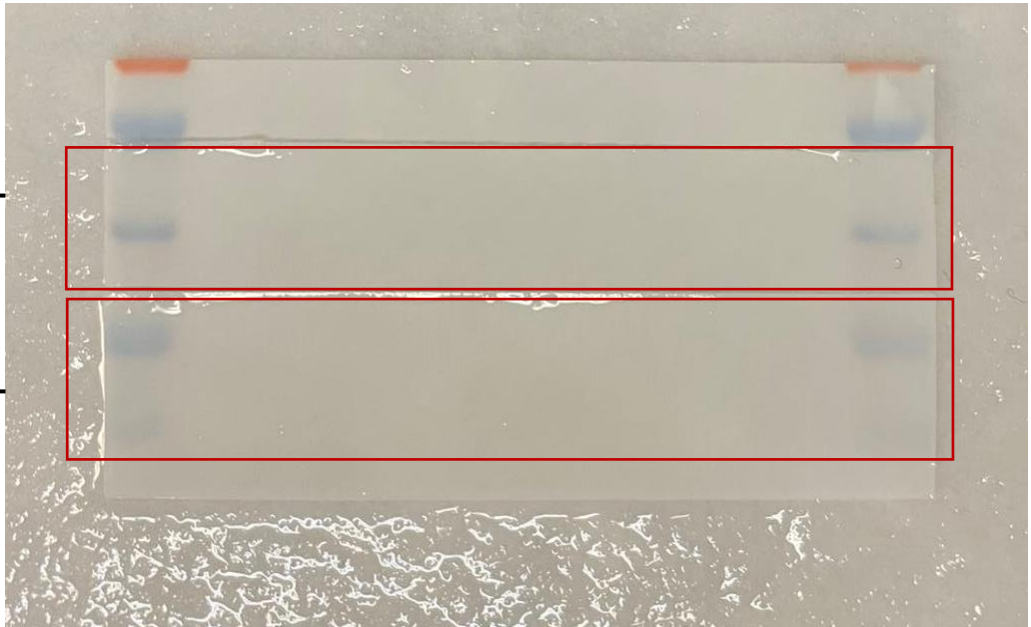

72kD

55kD

43kD

26kD

17kD

# **1、 WP up-regulated PKA/CREB/BDNF neurotrophic signaling in H<sub>2</sub>O<sub>2</sub>-treated SH-SY5Y cells**

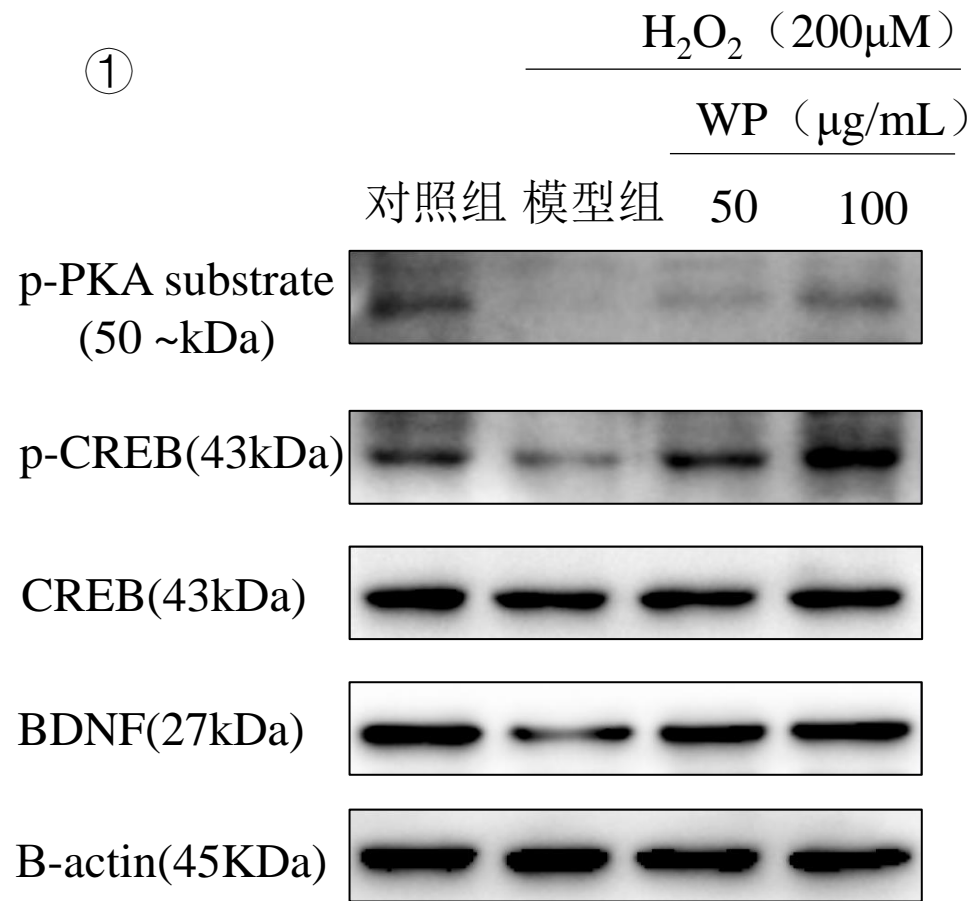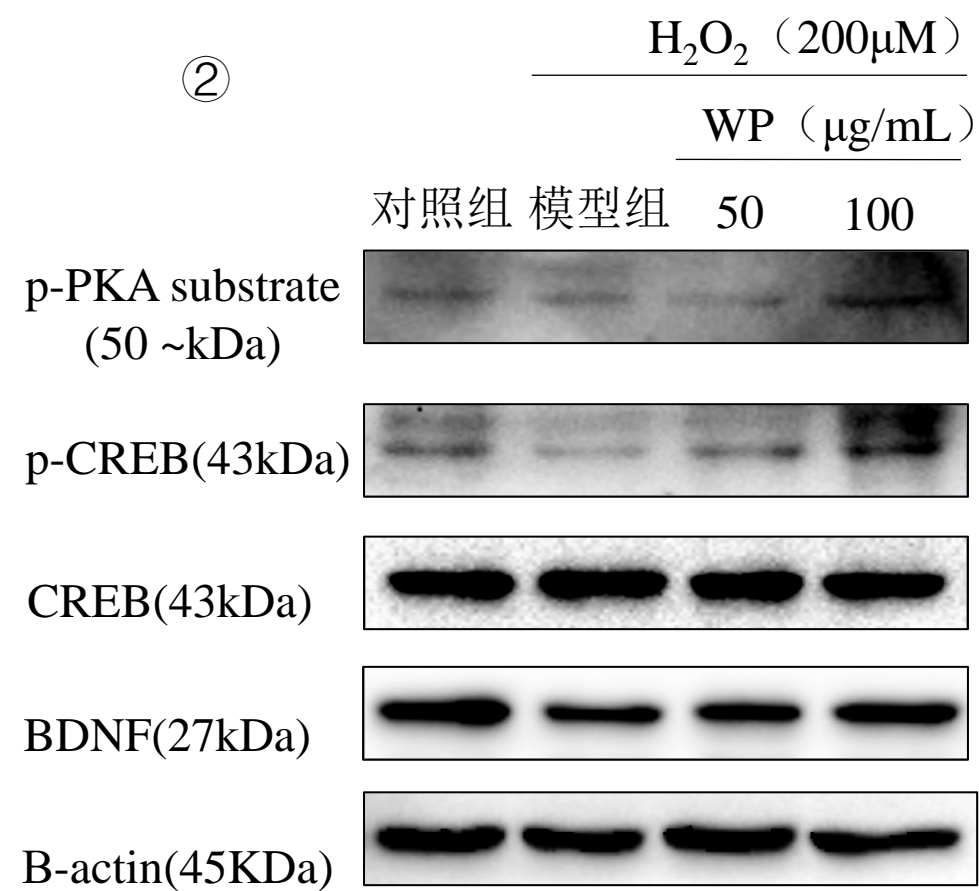

This is the western blot image used in the article.

③

H<sub>2</sub>O<sub>2</sub> (200μM)

WP (μg/mL)

对照组 模型组 50 100

p-PKA substrate  
(50 ~kDa)

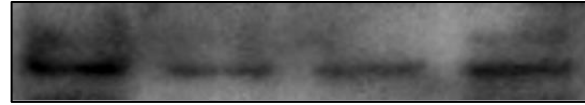

p-CREB(43kDa)

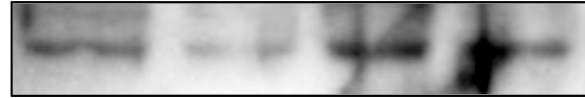

CREB(43kDa)

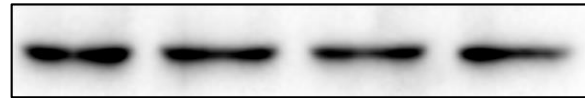

BDNF(27kDa)

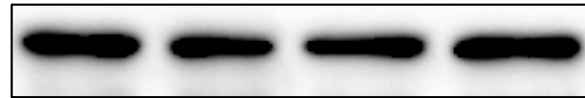

B-actin(45KDa)

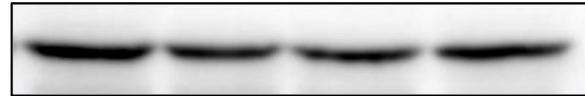

**2、 Blocking the activity of PKA abolished the cytoprotective effect of WP in H<sub>2</sub>O<sub>2</sub>-treated SH-SY5Y cells**

|   |                                       |   |   |   |   |
|---|---------------------------------------|---|---|---|---|
| ① | H <sub>2</sub> O <sub>2</sub> (200μM) | - | + | + | + |
|   | WP (100μg/mL)                         | - | - | + | + |
|   | H89 (10μM)                            | - | - | - | + |

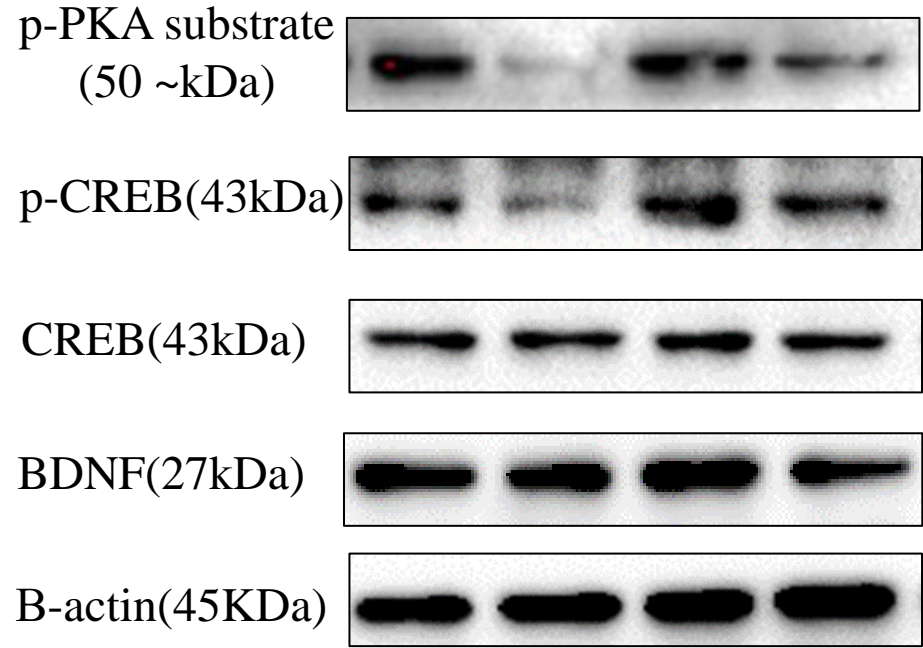

|   |                                       |   |   |   |   |
|---|---------------------------------------|---|---|---|---|
| ② | H <sub>2</sub> O <sub>2</sub> (200μM) | - | + | + | + |
|   | WP (100μg/mL)                         | - | - | + | + |
|   | H89 (10μM)                            | - | - | - | + |

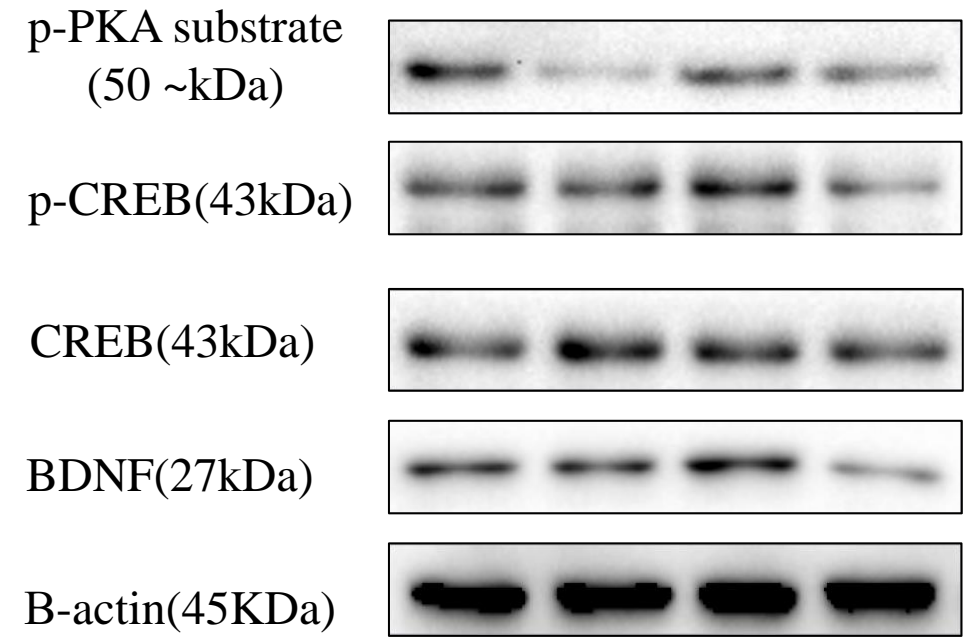

This is the western blot image used in the article.

|   |                                       |   |   |   |   |
|---|---------------------------------------|---|---|---|---|
| ③ | H <sub>2</sub> O <sub>2</sub> (200μM) | - | + | + | + |
|   | WP (100μg/mL)                         | - | - | + | + |
|   | H89 (10μM)                            | - | - | - | + |

p-PKA substrate  
(50 ~kDa)

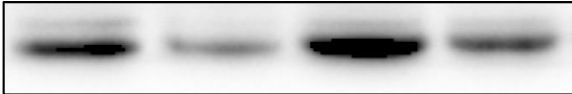

p-CREB(43kDa)



CREB(43kDa)



BDNF(27kDa)



B-actin(45KDa)





### **3、 UroA up-regulated PKA/CREB/BDNF neurotrophic signaling in H<sub>2</sub>O<sub>2</sub>-treated SH-SY5Y cells**

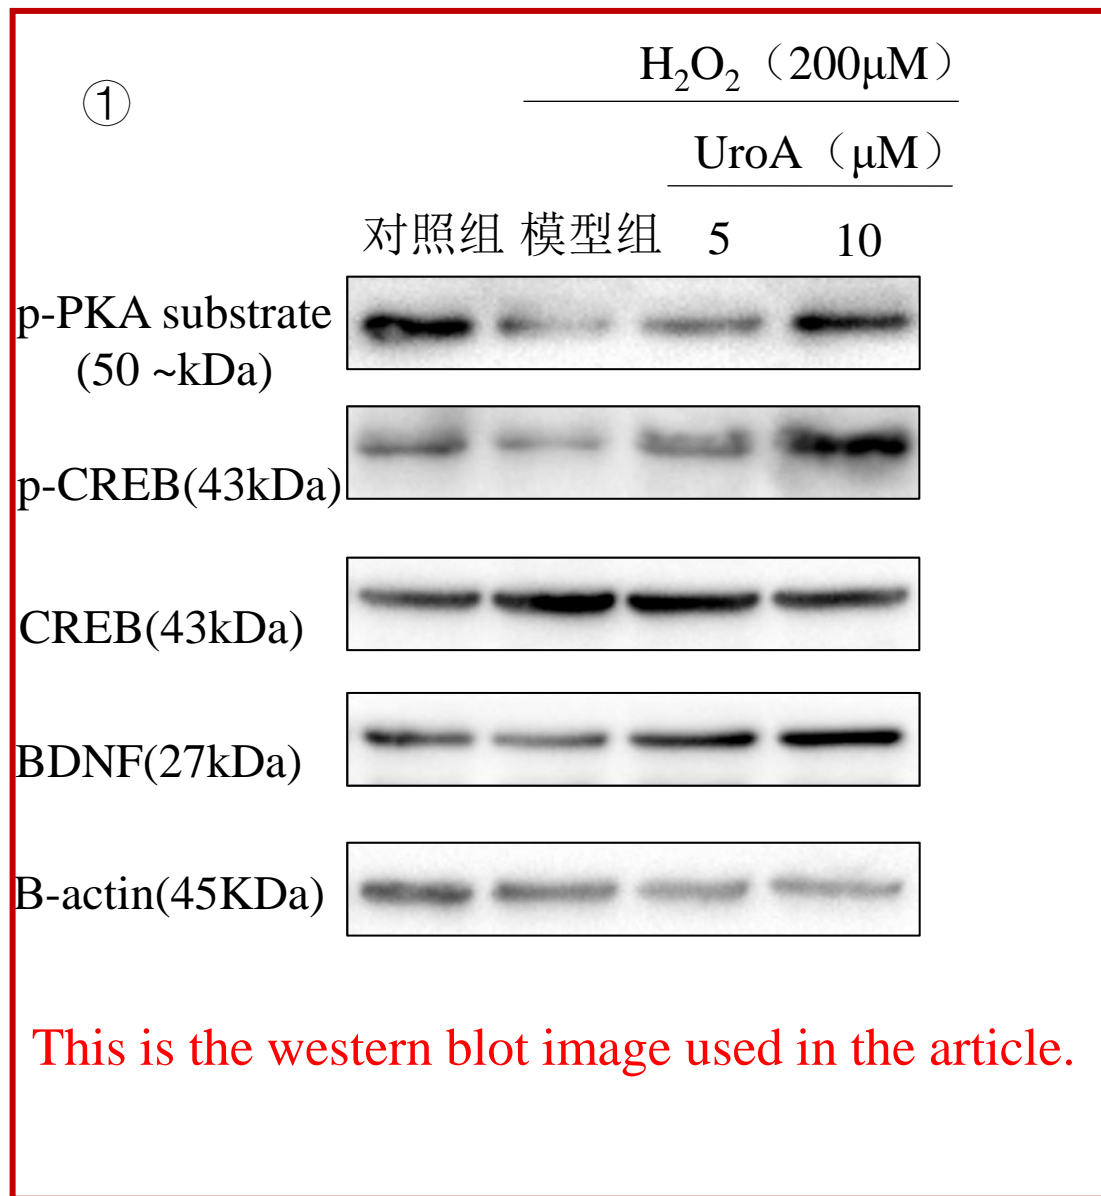

This is the western blot image used in the article.

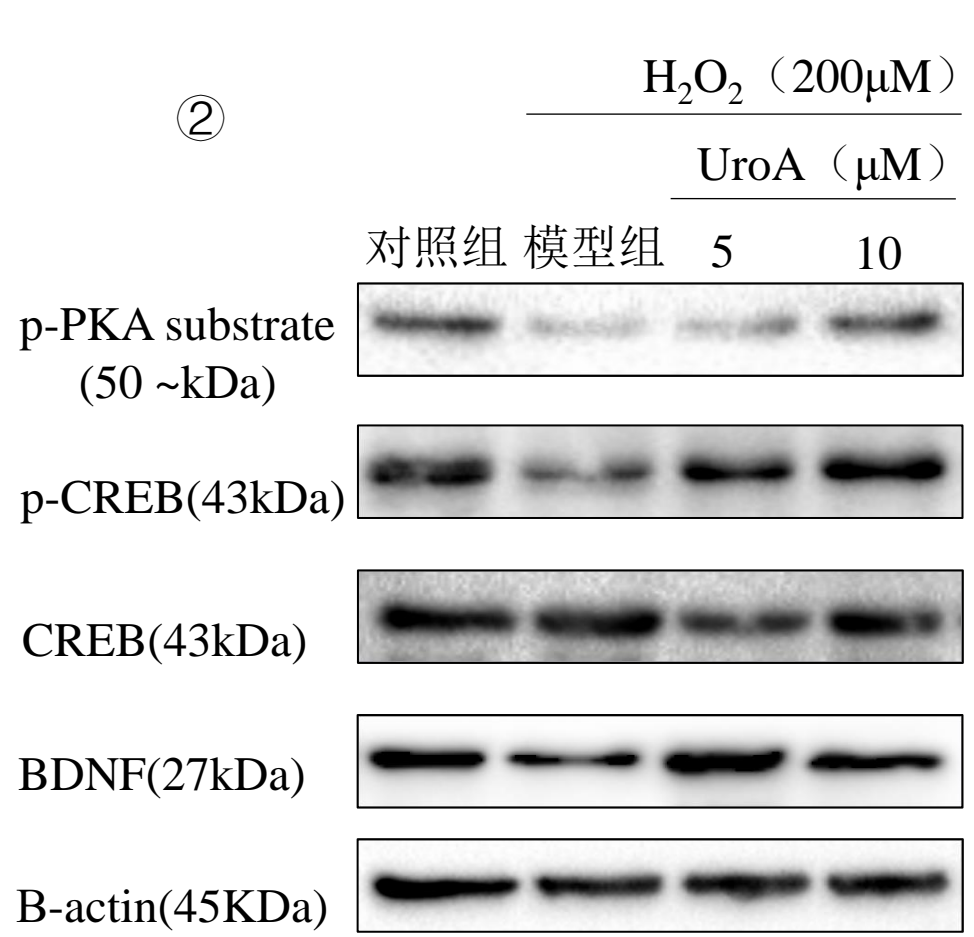

③

$H_2O_2$  (200 $\mu$ M)

UroA ( $\mu$ M)

对照组 模型组 5 10

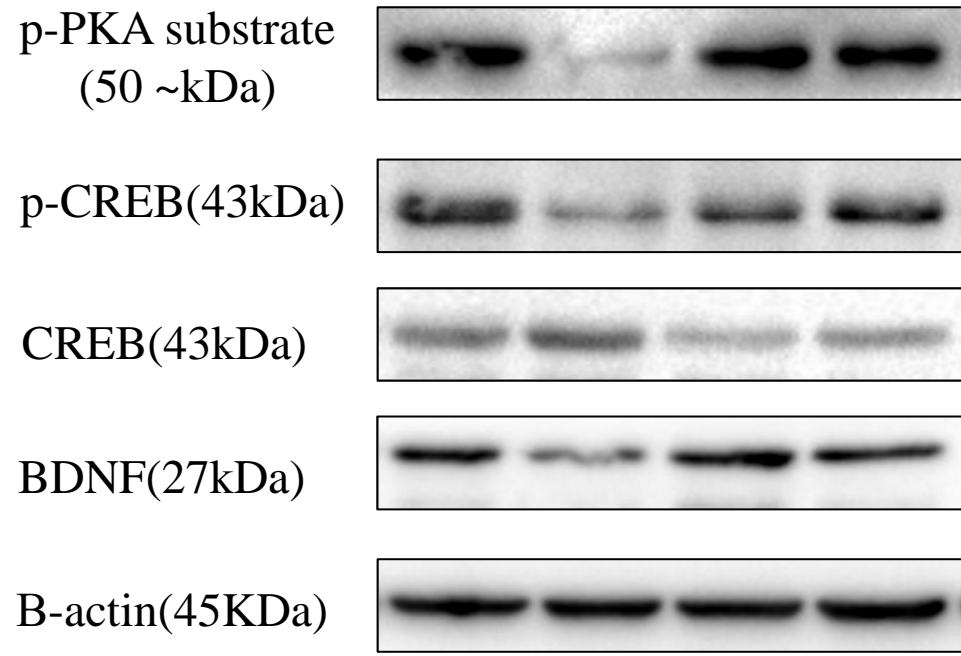

**4、 Blocking the activity of PKA abolished the cytoprotective effect of UroA in H<sub>2</sub>O<sub>2</sub>-treated SH-SY5Y cells**

|   |                                       |   |   |   |   |
|---|---------------------------------------|---|---|---|---|
| ① | H <sub>2</sub> O <sub>2</sub> (200μM) | - | + | + | + |
|   | UroA (10μM)                           | - | - | + | + |
|   | H89 (10μM)                            | - | - | - | + |

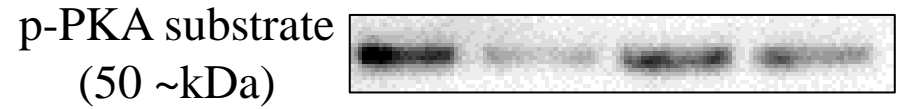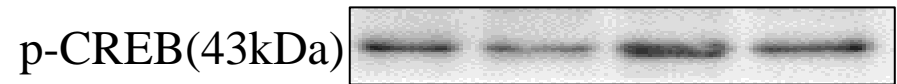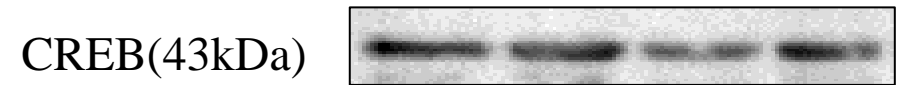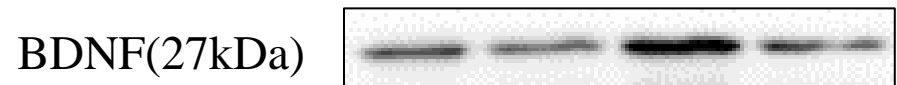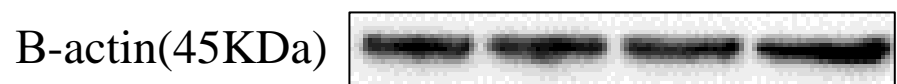

|   |                                       |   |   |   |   |
|---|---------------------------------------|---|---|---|---|
| ② | H <sub>2</sub> O <sub>2</sub> (200μM) | - | + | + | + |
|   | UroA (10μM)                           | - | - | + | + |
|   | H89 (10μM)                            | - | - | - | + |

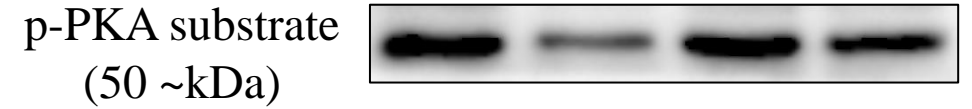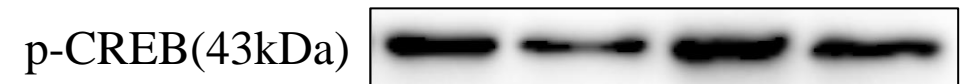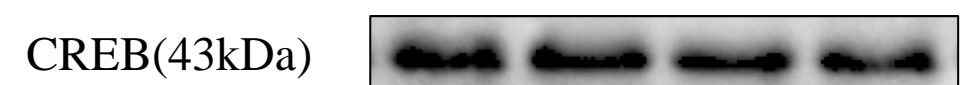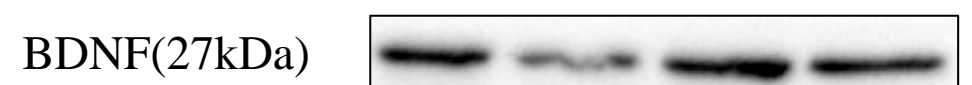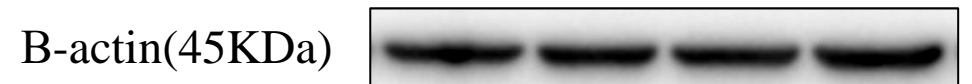

This is the western blot image used in the article.

|   |                                       |   |   |   |   |
|---|---------------------------------------|---|---|---|---|
| ③ | H <sub>2</sub> O <sub>2</sub> (200μM) | - | + | + | + |
|   | UroA (10μM)                           | - | - | + | + |
|   | H89 (10μM)                            | - | - | - | + |

p-PKA substrate  
(50 ~kDa)



p-CREB(43kDa)



CREB(43kDa)



BDNF(27kDa)



B-actin(45KDa)



Supplement: d2fo03310k1.pdf [file d2fo03310k1.pdf]
